# Supplementary material for: Patterns and trends of utilization of incretin-based medicines between 2008 and 2014 in three Italian geographic areas
Source: Springer Nature journal article supplement (doi:10.1186/s12902-019-0334-y), 2019-02-07

Standardized prevalence of use  
per 100 anti-diabetic users 18+

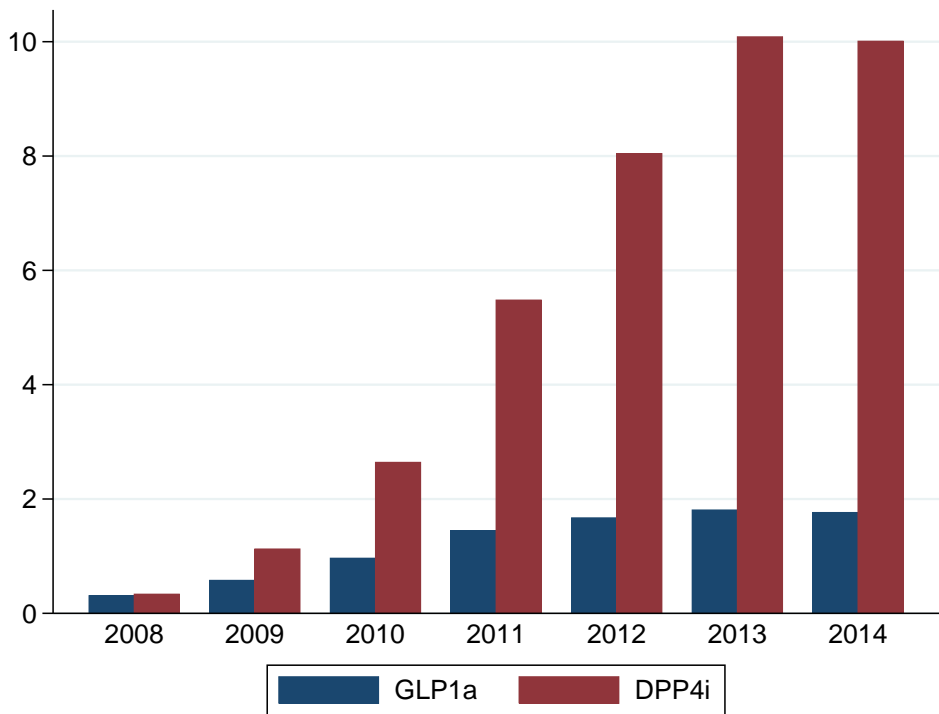

Supplement: MOESM5 [file 16456928]
